## **Supplementary Material**

### **Correlative super-resolution fluorescence and scanning electron microscopy of the nuclear pore complex with molecular resolution**

Anna Löschberger<sup>1</sup>, Christian Franke<sup>1</sup>, Georg Krohne<sup>2</sup>,  
Sebastian van de Linde<sup>1</sup>, and Markus Sauer<sup>1</sup>

<sup>1</sup>Department of Biotechnology and Biophysics, Biozentrum  
Julius Maximilian University Würzburg  
Am Hubland  
97074 Würzburg  
Germany

<sup>2</sup>Department of Electron Microscopy, Biozentrum  
Julius Maximilian University Würzburg,  
Am Hubland, 97074 Würzburg,  
Germany

Email: [m.sauer@uni-wuerzburg.de](mailto:m.sauer@uni-wuerzburg.de)

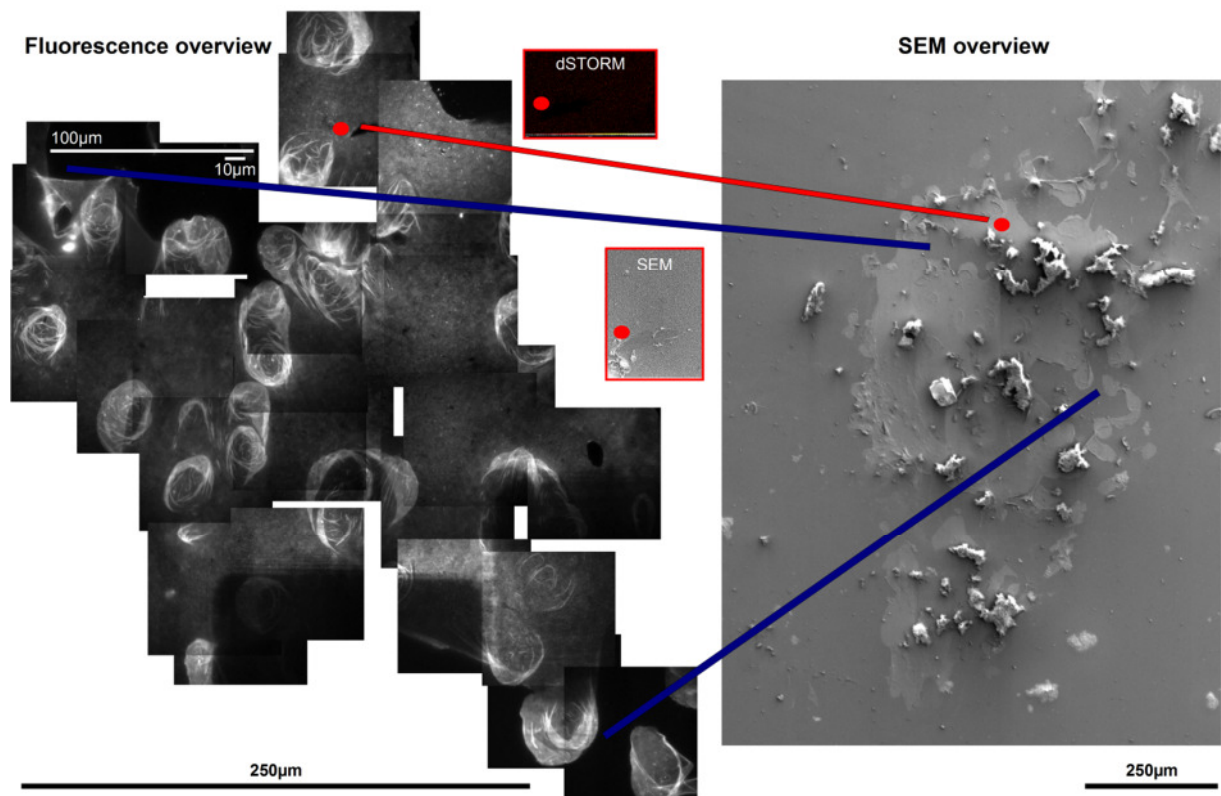

**Figure S1. Correlative imaging procedure.** Wide-field fluorescence and SEM overviews of nuclear envelopes of *Xenopus laevis* oocytes were used to find the region of interest (red dot) for SEM after *d*STORM imaging. Blue and red lines serve as orientation. Scale bars, see image.

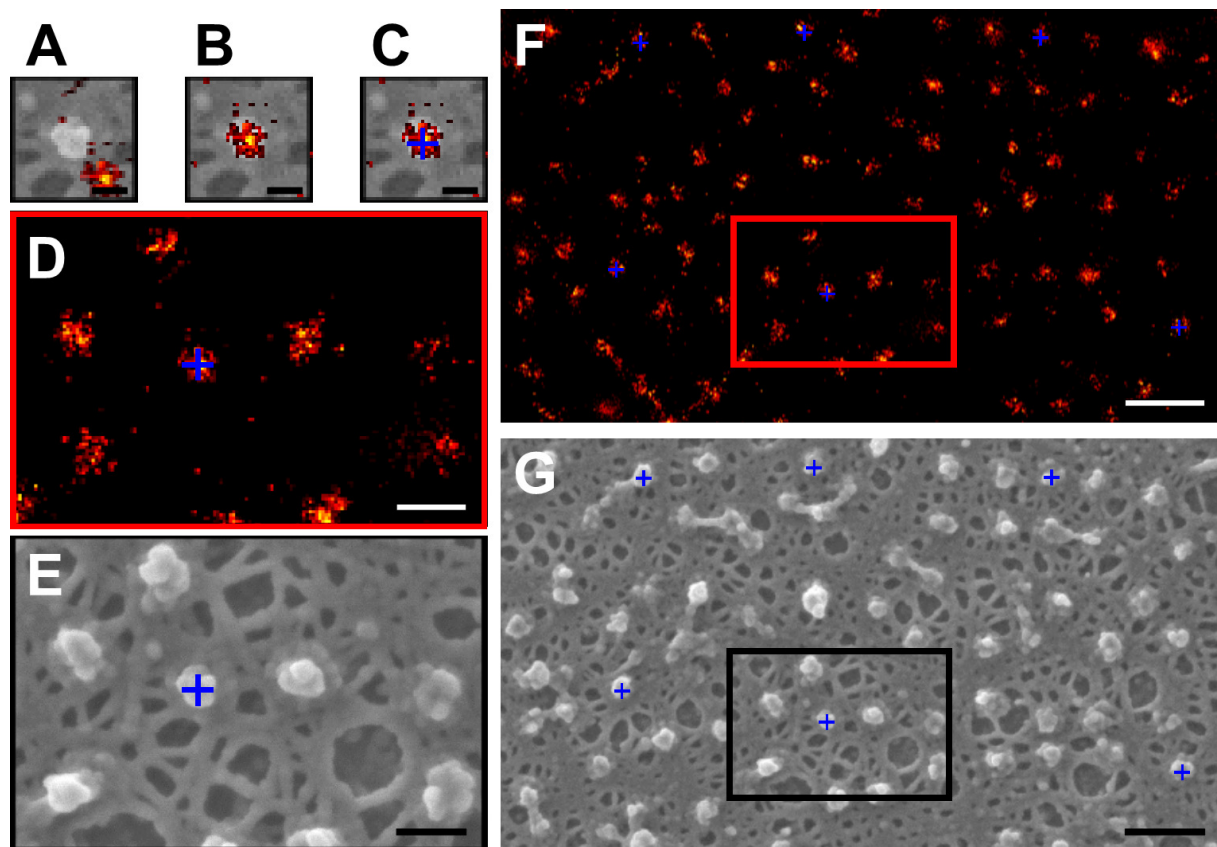

**Figure S2. Landmark selection for correlative images of WGA Alexa Fluor 647 labeled NPCs of *Xenopus laevis* oocytes.** (A-G) After adjusting the pixel size of the *d*STORM and the SEM image the *d*STORM/SEM overlay image is moved manually to a corresponding SEM pore (A,B). Corresponding pores are landmarked (+) (C-E). Only nuclear pores that match each other very precisely are chosen for future landmarks (F,G). Images were finally transformed with bUnwarpJ. Scale bars, 50 nm (A-C), 100 nm (D,E), 250 nm (F,G).



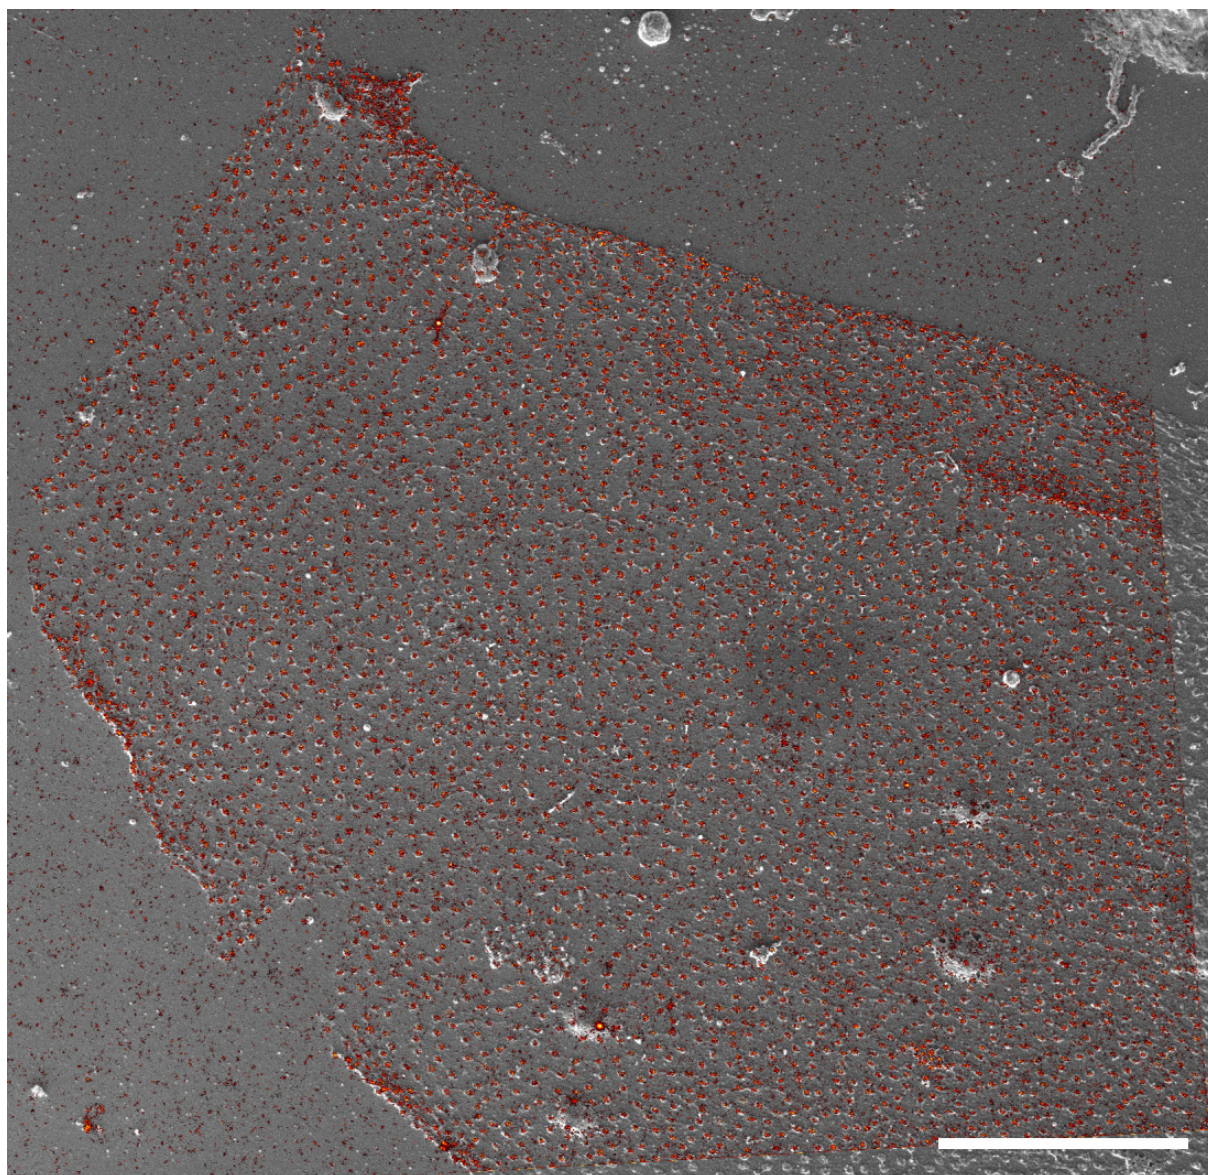

**Figure S3. Correlative SEM-dSTORM image.** The majority of Alexa 647 WGA labeled NPCs perfectly fit the SEM image. Scale bar, 5  $\mu\text{m}$ .

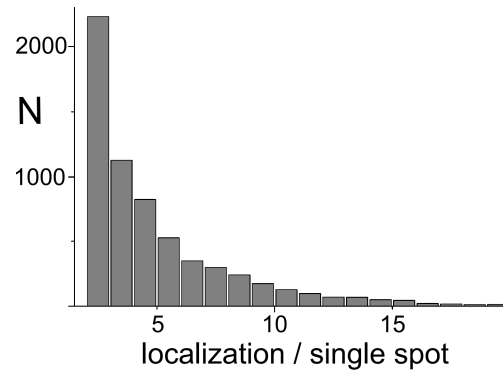

**Figure S4. Localization statistics of Alexa 647 labeled F(ab')<sub>2</sub> fragments in the absence of primary antibody directed against gp210 proteins.** Single-molecule experiments (sample size 5.000 isolated fluorescence signals) with Alexa 647 labeled F(ab')<sub>2</sub> fragments non-specifically adsorbed on nuclear envelopes show a similar distribution of localizations identified per single spatially isolated fluorescence signal than obtained in our quantification experiments (Fig. 3C). The mean localization number is determined to  $5.4 \pm 0.1$  (s.e.) localizations per Alexa 647 labeled F(ab')<sub>2</sub> fragment (median: 3.5).
